# Supplementary material
Source: publisher figshare collection journal article supplement (https://acs.figshare.com/ndownloader/files/4002100)
Supplement: Supplementary file 1 [file 4002100]

## Supporting Information for

# Redox-Responsive Block Copolymers: Poly(vinylferrocene)-*b*-Poly(lactide) Diblock and Miktoarm Star Polymers and their Behavior in Solution

Jan Morsbach,<sup>†</sup> Adrian Natalello,<sup>†,#</sup> Johannes Elbert,<sup>‡</sup> Svenja Winzen,<sup>§</sup> Anja  
Kroeger,<sup>§</sup> Holger Frey,<sup>†,\*</sup> Markus Gallei<sup>‡,\*</sup>

<sup>†</sup>Institute of Organic Chemistry, Organic and Macromolecular Chemistry, Johannes  
Gutenberg-University (JGU), Duesbergweg 10-14, D-55099 Mainz, Germany

<sup>§</sup>Max Planck Institute for Polymer Research, Ackermannweg 10, D-55128 Mainz, Germany

<sup>‡</sup>Ernst-Berl Institute for Chemical Engineering and Macromolecular Science, Darmstadt  
University of Technology, Petersenstraße 22, D-64287 Darmstadt, Germany

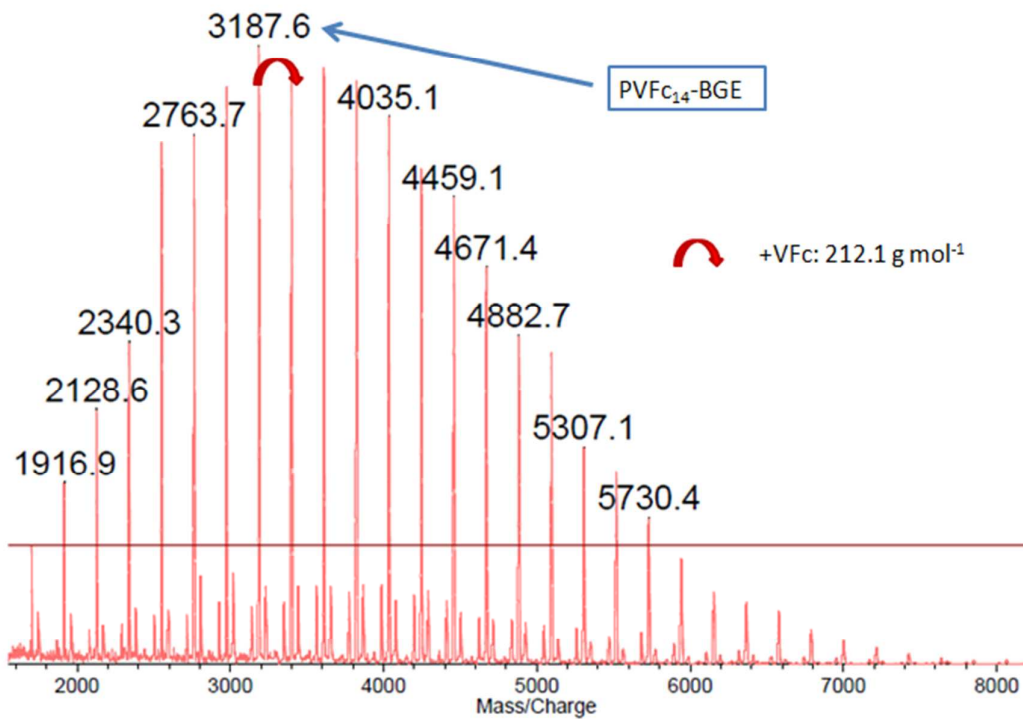

**Figure S1:** MALDI-ToF spectrum of PVFc<sub>36</sub>-BGE (matrix: dithranol)

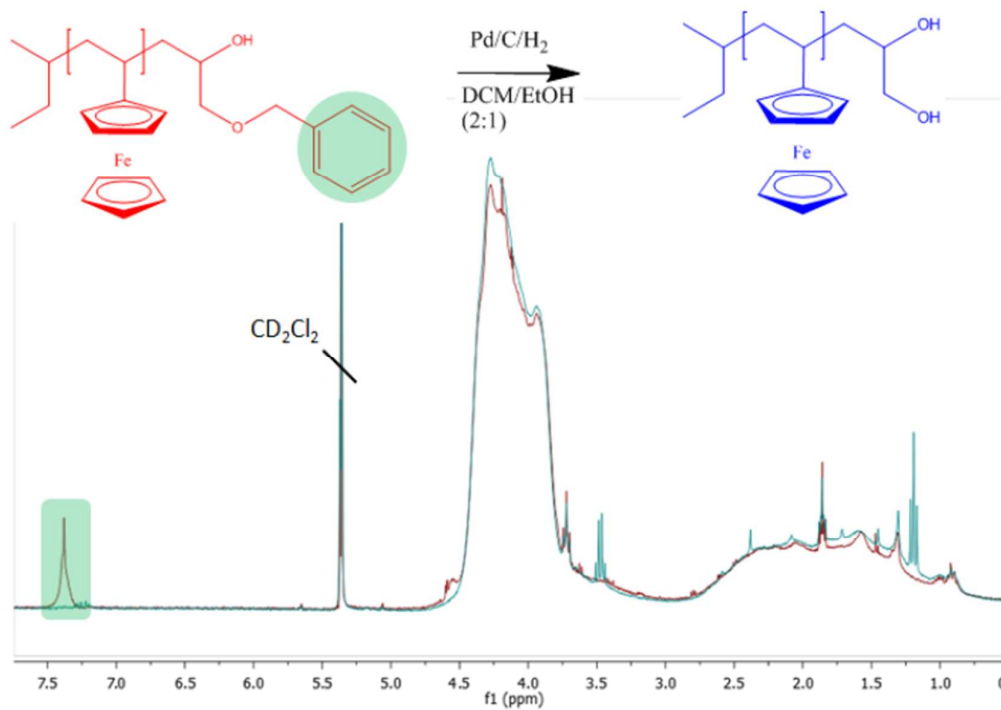

**Figure S2:** Overlay of two <sup>1</sup>H-NMR spectra; PVFc-BGE before hydrogenation (red) and PVFc-OH<sub>2</sub> subsequent to hydrogenation (blue)

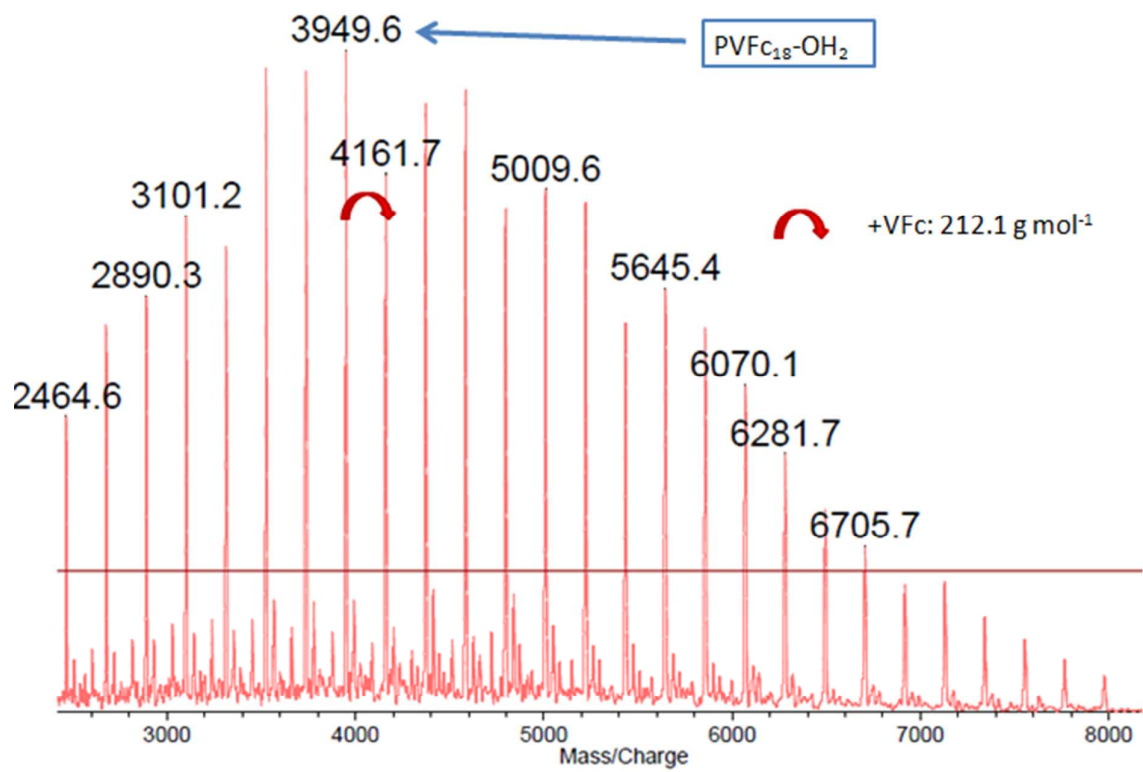

**Figure S3:** MALDI-ToF spectrum of PVFc<sub>36</sub>-(OH)<sub>2</sub> (matrix: dithranol)

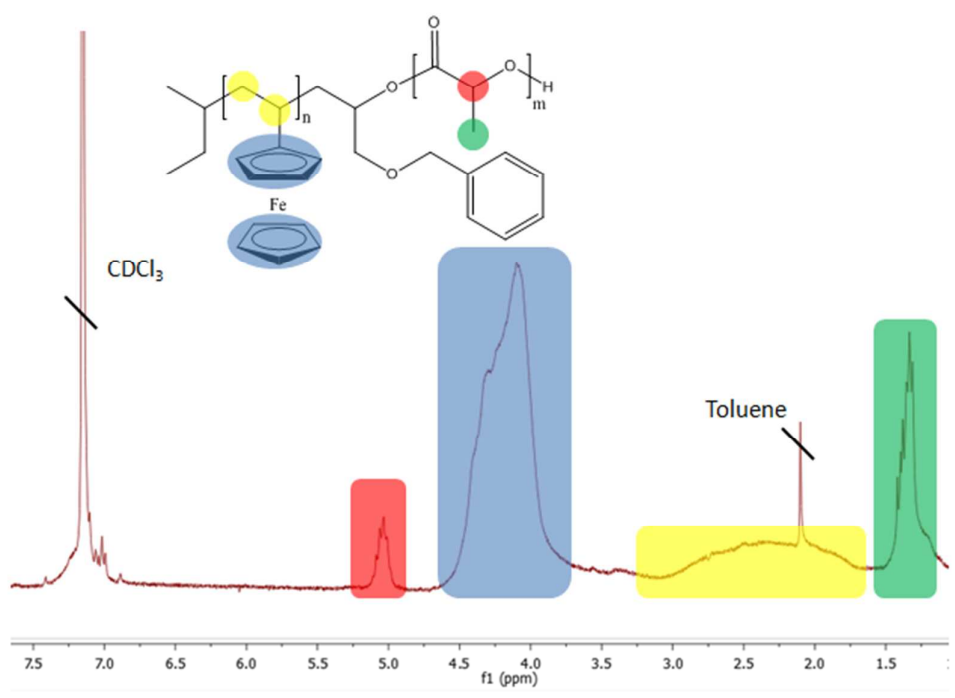

**Figure S4:** Exemplary <sup>1</sup>H-NMR spectrum for PVFc-PLA copolymers (PVFc<sub>36</sub>-*b*-PLA<sub>15</sub>)

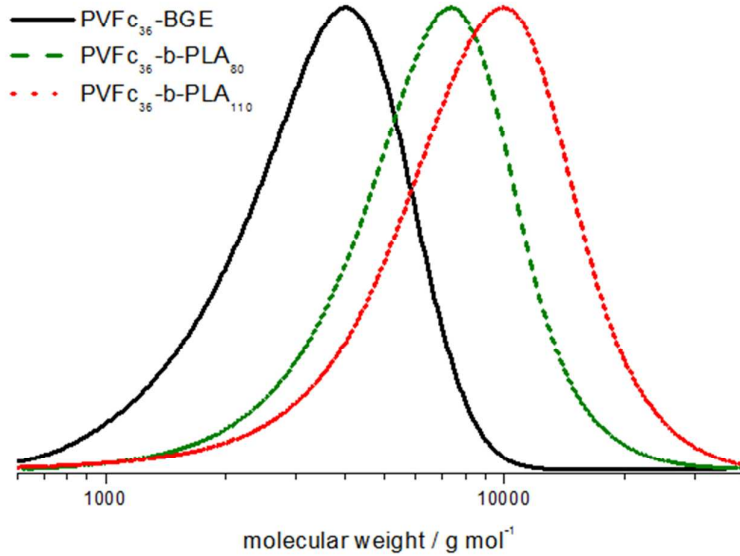

**Figure S5:** SEC-traces of PVFc-BGE macroinitiator and two exemplary PVFc-*b*-PLA block copolymers (DMF, UV-signal)

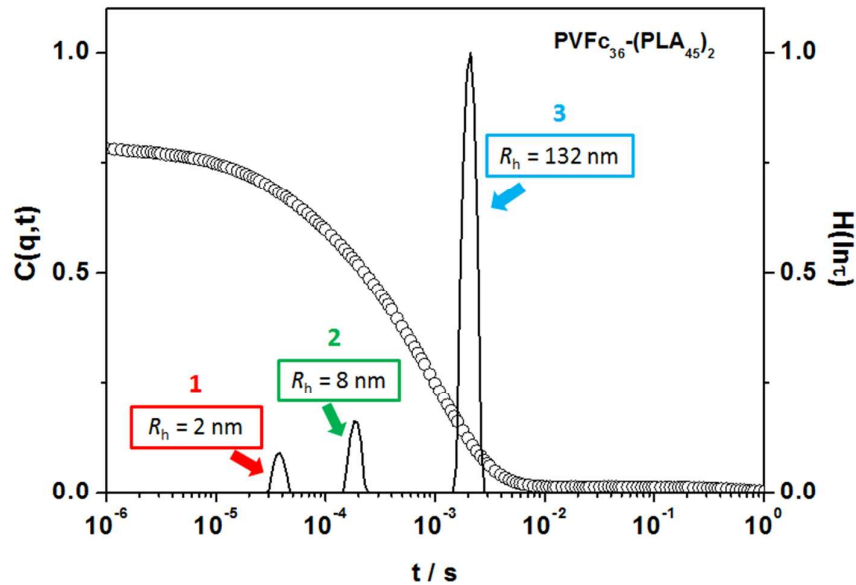

**Figure S6:** Relaxation function  $C(q,t)$  (empty circles) for the concentration fluctuations along with the corresponding distribution of relaxation times  $H(\ln\tau)$  (straight line) at  $q = 0.0108 \text{ nm}^{-1}$  of a PVFc<sub>36</sub>-(PLA<sub>45</sub>)<sub>2</sub> miktoarm star polymer in CH<sub>2</sub>Cl<sub>2</sub> with  $c = 0.05 \text{ g L}^{-1}$  at  $T = 20 \text{ }^\circ\text{C}$ . Peak 1 ( $R_h = 2 \text{ nm}$ ) is interpreted to belong to single diffusing polymer chains whereas Peak 2 ( $R_h = 8 \text{ nm}$ ) probably represents micellar structures. Peak 3 ( $R_h = 132 \text{ nm}$ ) is the main diffusion process which is assigned to well defined superstructures.

DLS data evaluation was performed by using the the CONTIN algorithm. The CONTIN algorithm is used for the analysis of multiple decay processes and is given by

$$C(q, t) = \int_{-\infty}^{\infty} H_{\tau}(\ln \tau) \exp\left[-\frac{t}{\tau}\right] d(\ln \tau) \quad (1)$$

where  $C(q, t)$  is the computed correlation function,  $\tau$  the relaxation time and  $H_{\tau}(\ln \tau)$  the distribution function of relaxation times.<sup>1</sup>

## REFERENCES

(1) Winzen, S.; Bernhardt, M.; Schaeffel, D.; Koch, A.; Kappl, M.; Koynov, K.; Landfester, K.; Kroeger, A. *Soft Matter*. **2013**.
